# Supplementary material for: Environmental evaluation of carbon dot and fullerene formation in atmospheric particulate matter (PM10): observations from their free radical scavenging and electrochemical studies
Source: Royal Society of Chemistry journal article supplement (doi:10.1039/d2en00588c), 2022-11-22
Supplement: d2en00588c1.pdf [file d2en00588c1.pdf]

## SUPPLEMENTARY INFORMATION (SI)

### **Environmental evaluation of carbon dots and fullerene formations in atmospheric particulate matter (PM<sub>10</sub>): observations from their free radical scavenging and electrochemical studies**

Nazrul Islam<sup>ab</sup>, Mousumi Bora<sup>ab</sup>, Monikankana Saikia<sup>ab</sup>, Anusuya Boruah<sup>ab</sup>, Kallol Roy<sup>c</sup>, Rituraj Konwar<sup>c</sup>, Binoy K Saikia<sup>ab\*</sup>

<sup>a</sup>Coal & Energy Division, CSIR-North East Institute of Science & Technology, Jorhat 785006, India

<sup>b</sup>Academy of Scientific & Innovative Research (AcSIR), Ghaziabad 201002, India

<sup>c</sup>Biotechnology Group, Biological Science and Technology Division, CSIR-North East Institute of Science and Technology, Jorhat-785006, Assam, India

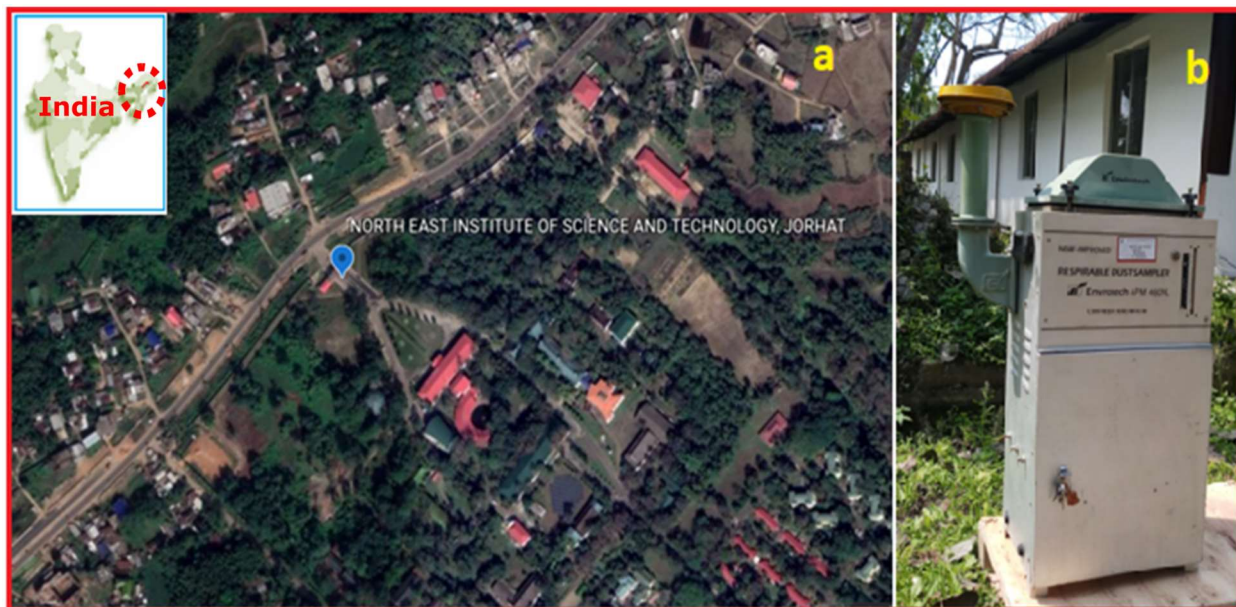

Figure S1: Showing the study area (in Google Earth) and India map (inset) highlighting the North eastern region of India (a); and Respirable Dust Sampler used for the collection of PM<sub>10</sub> (b).

Table S1: XPS analysis showing the presence of elements in synthesized wsCDs.

| Name | Peak    | FWHM (eV) | Atomic (%) |
|------|---------|-----------|------------|
| K2p  | 294.74  | 4.2       | 0.2        |
| O1s  | 531     | 4.48      | 40.52      |
| C1s  | 284.33  | 4.89      | 43.16      |
| Na1s | 1070.32 | 4.42      | 5.55       |
| Si2p | 101.84  | 4.19      | 7.98       |
| N1s  | 398.6   | 4.59      | 1.68       |
| Cl2p | 197.8   | 5.28      | 0.9        |

Table S2: XPS analysis showing the presence of elements in synthesized wsOLFs.

| Name | Peak    | FWHM (eV) | Atomic (%) |
|------|---------|-----------|------------|
| O1s  | 531.98  | 4.65      | 34.54      |
| C1s  | 284.29  | 4.71      | 51.82      |
| S2p  | 168.65  | 4.47      | 6.58       |
| Na1s | 1071.68 | 5.02      | 1.42       |
| N1s  | 400.9   | 4.46      | 2.08       |
| Si2p | 102.66  | 4.26      | 2.91       |
| Ca2p | 347.6   | 6.9       | 0.63       |

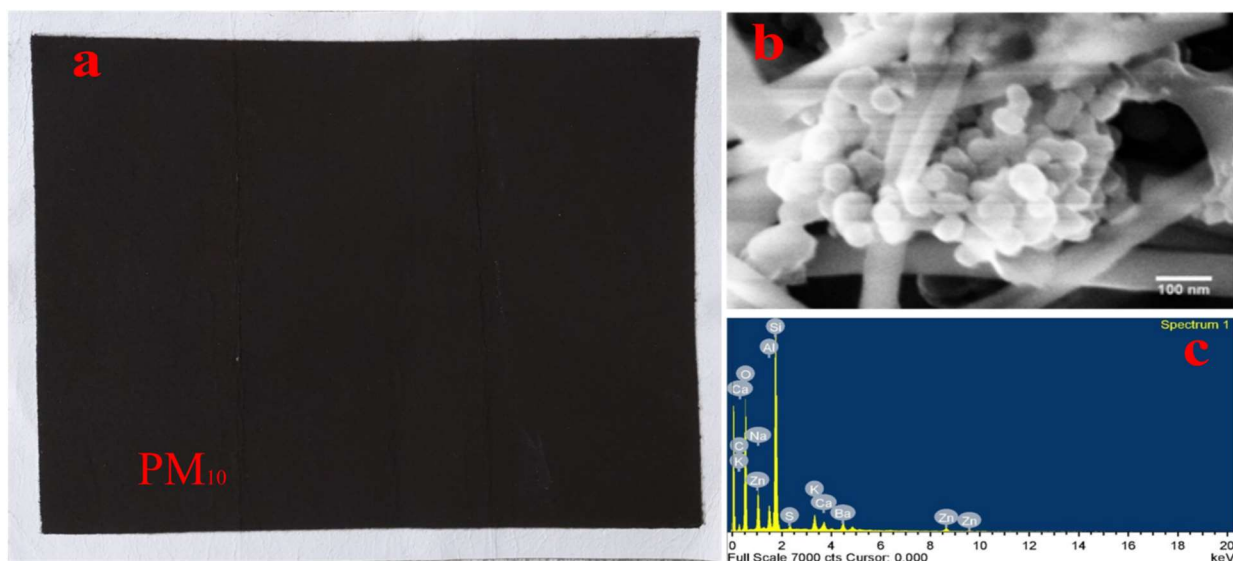

Figure S2: (a) Showing the deposition of atmospheric PM<sub>10</sub> in quartz microfibre filters utilised as a source for synthesisi of carbon nanomaterials, (b) FE-SEM micrograph of PM<sub>10</sub> showing the particle morphology without any chemical treatment, and (c) Elemental composition of PM<sub>10</sub> analyzed by FE-SEM EDS without any chemical treatment.

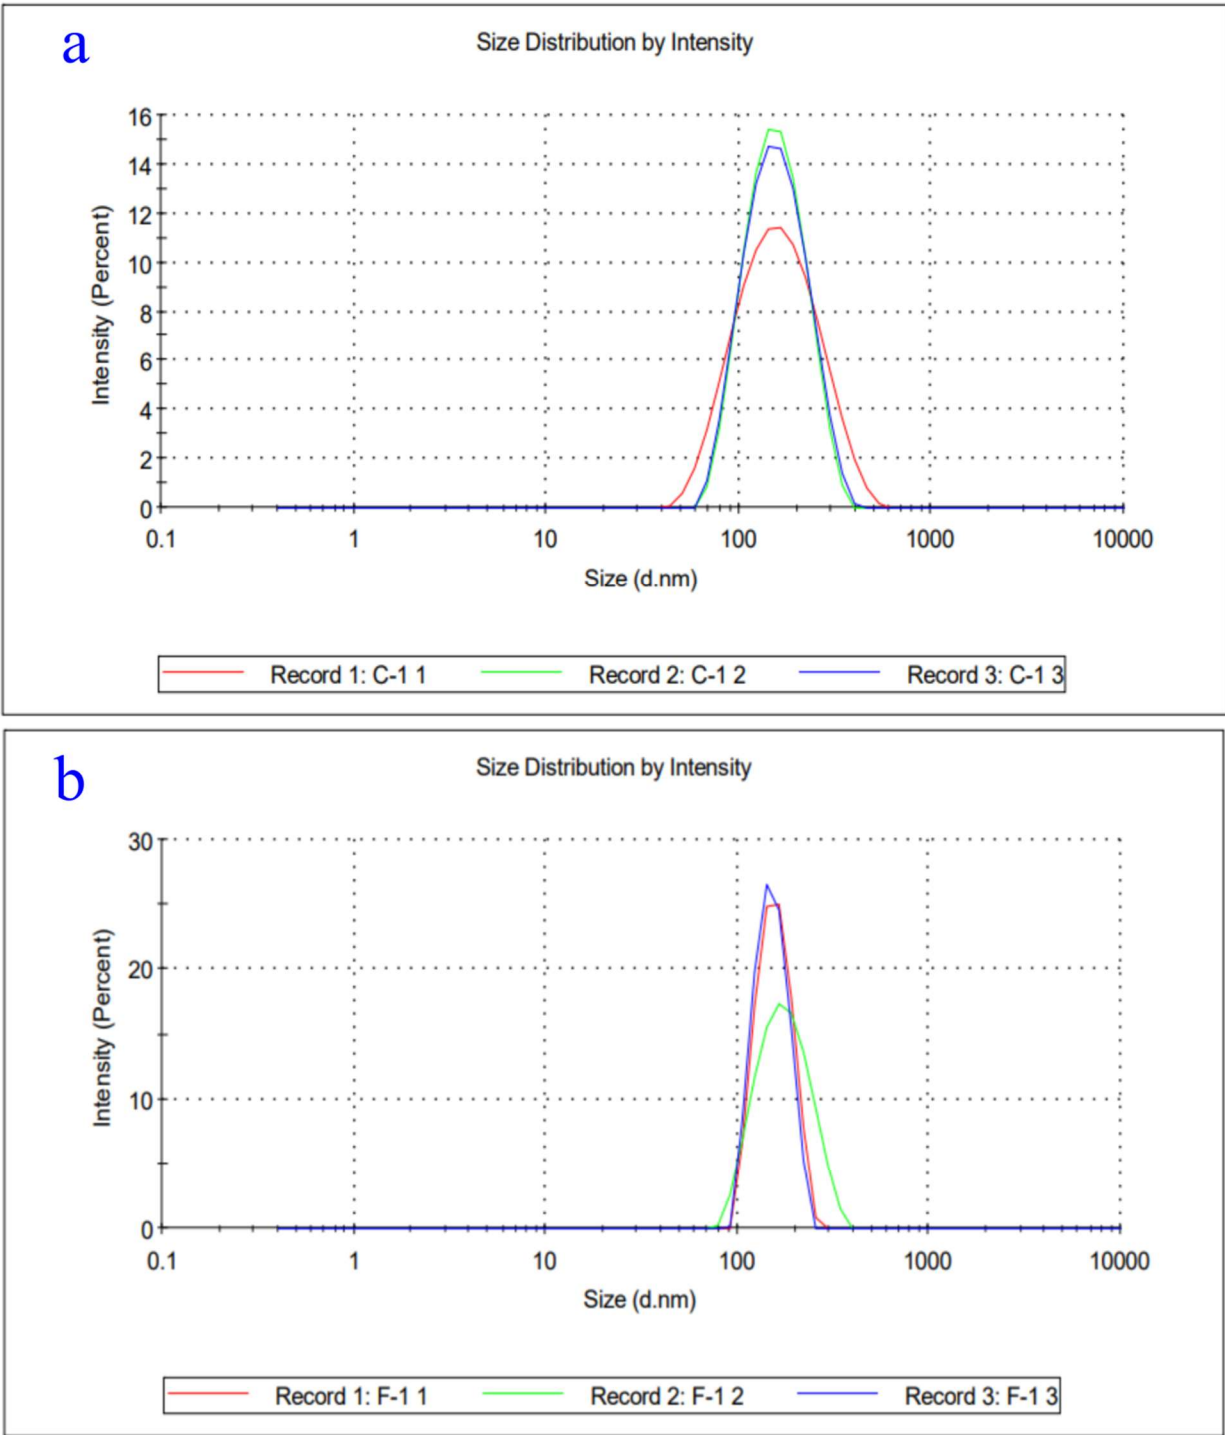

Figure S3: Dynamic Light Scattering (DLS) Analysis of PM derived wsCDs (a) and wsOLFs (b).

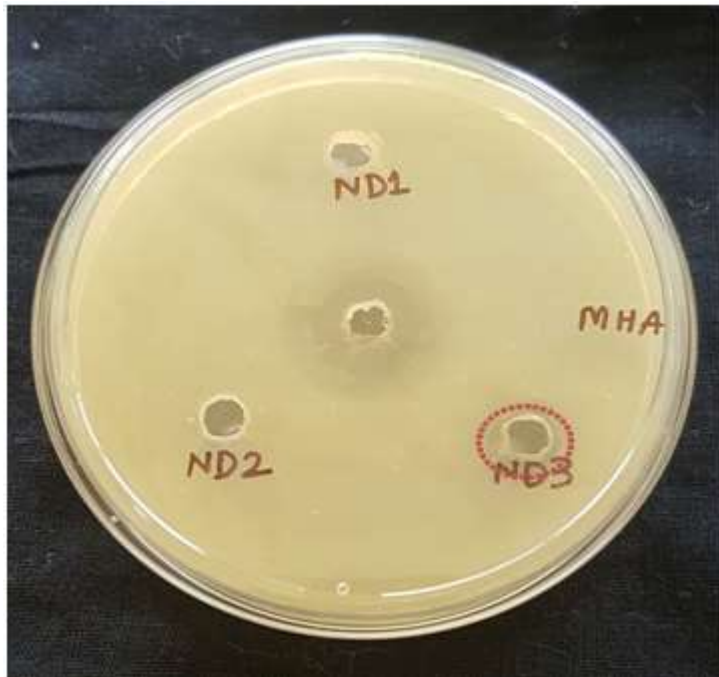

Figure S4: Antibacterial activity of atmospheric particulate matter (ND1) and derived carbon nanomaterials like wsCDs (ND2) and wsOLFs (ND3). The unmarked central well is positive control showing clear zone of inhibition. The particulate matter and synthesized wsCDs (20 $\mu$ l) do not inhibit the growth of bacterial strain. The synthesized wsOLFs (20 $\mu$ l) shows growth inhibition zone indicating the presence of antibacterial property.
